1 **Midbody remnant inheritance is regulated by the ESCRT subunit**  
2 **CHMP4C**

3  
4  
5  
6  
7 **Condensed title:** A physical connection between the midbody remnant and the plasma  
8 membrane

9  
10 **Authors:** Javier Casares-Arias<sup>1</sup>, María Ujué Gonzalez<sup>2¶</sup>, Alvaro San Paulo<sup>2¶</sup>, Leandro  
11 N. Ventimiglia<sup>3</sup>, Jessica B. A. Sadler<sup>3</sup>, David G. Miguez<sup>1,4</sup>, Leticia Labat-de-Hoz<sup>1</sup>,  
12 Armando Rubio-Ramos<sup>1</sup>, Laura Rangel<sup>1,5</sup>, Miguel Bernabé-Rubio<sup>1</sup>, Jaime Fernández-  
13 Barrera<sup>1</sup>, Isabel Correas<sup>1,5</sup>, Juan Martín-Serrano<sup>3</sup> and Miguel A. Alonso<sup>1\*</sup>

14  
15 **Affiliations:** <sup>1</sup>Centro de Biología Molecular Severo Ochoa, Consejo Superior de  
16 Investigaciones Científicas and Universidad Autónoma de Madrid, <sup>2</sup>Instituto de Micro y  
17 Nanotecnología, Consejo Superior de Investigaciones Científicas, <sup>3</sup>Department of  
18 Infectious Diseases, Faculty of Life Sciences and Medicine, King's College London,  
19 <sup>4</sup>Department of Condensed Matter Physics and <sup>5</sup>Department of Molecular Biology,  
20 Universidad Autónoma de Madrid

21  
22 **Keywords:** Midbody remnant; ESCRT complex; primary cilium; polarized epithelial  
23 cells; cytokinesis

24  
25 **\*Corresponding author:** maalonso@cbm.csic.es

26  
27 <sup>¶</sup>Equal contribution

28  
29 **Abbreviations:** CHMP, charged multivesicular body protein; CLEM, correlative light  
30 and electron microscopy; ESCRT, endosomal sorting complex required for transport;  
31 FB, Flemming body; MB, midbody; MBR, midbody remnant; SEM, scanning electron  
32 microscopy; VLV, very-low-voltage

33

33 **Abstract**

34 The inheritance of the midbody remnant (MBR) breaks the symmetry of the two  
35 daughter cells, with functional consequences for lumen and primary cilium formation  
36 by polarized epithelial cells, and also for development and differentiation. However,  
37 despite their importance, neither the relationship between the plasma membrane and the  
38 inherited MBR nor the mechanism of MBR inheritance is well known. Here, the  
39 analysis by correlative light and ultra-high-resolution scanning electron microscopy  
40 reveals a membranous stalk that physically connects the MBR to the apical membrane  
41 of epithelial cells. The stalk, which derives from the uncleaved side of the midbody,  
42 concentrates the ESCRT machinery. The ESCRT CHMP4C subunit enables MBR  
43 inheritance, and its depletion dramatically reduces the percentage of ciliated cells. We  
44 demonstrate: (1) that MBRs are physically connected to the plasma membrane, (2) how  
45 CHMP4C helps maintain the integrity of the connection, and (3) the functional  
46 importance of the connection.

47

## 47 **Introduction**

48       The midbody (MB) is the narrow bridge that connects the two nascent daughter  
49 cells resulting from animal cell division. MB cleavage results in the physical separation  
50 of the cells, through a process known as abscission, and in the formation of an MB  
51 remnant (MBR) (Fededa and Gerlich, 2012, Mierzwa and Gerlich, 2014). Increasing  
52 evidence indicates that, instead of being an abscission byproduct, the MBR assumes  
53 important roles in development and differentiation (Chen et al., 2013). In polarized  
54 renal epithelial cells, the MBR licenses the centrosome to assemble the primary cilium,  
55 which is a solitary plasma membrane protrusion involved in the regulation of multiple  
56 developmental signaling pathways (Bernabe-Rubio et al., 2016, Bernabé-Rubio et al.,  
57 2019), and defines the location of the apical membrane during lumen formation (Lujan  
58 et al., 2017).

59       The MB is continuous with the plasma membrane and consists of an electron-  
60 dense central region called the Flemming body (FB) (Byers and Abramson, 1968),  
61 which comprises anti-parallel microtubule bundles. Flanking the FB, the MB has two  
62 arms, containing parallel microtubule bundles, vesicles and protein factors, that bridges  
63 the two daughter cells. In principle, when severing occurs on both arms, the MBR  
64 becomes extracellular and it can remain free in the extracellular milieu, or stay attached  
65 to the surface of one of the daughter cells. or of a neighboring cell, or be eliminated.  
66 However, severing on just one arm should lead to the MBR to be inherited by the cell  
67 on the opposite side, although this has not been well documented experimentally (Schiel  
68 et al., 2011). Given the importance of the MBR, it seems inevitable that its fate must be  
69 tightly regulated (Ou et al., 2014, Dionne et al., 2015). However, despite the enormous  
70 effort expended on trying to understand the mechanism of the first cleavage of the MB,  
71 which marks the end of the abscission process, little attention has been paid to the  
72 inheritance of the connected MBRs and, thus, to the regulation of the cut of the  
73 membrane of the other MB arm.

74       In this study, using ultra-high-resolution scanning electron microscopy (SEM),  
75 we demonstrate the existence of the physical continuity between the MBR membrane  
76 and the plasma membrane of Madin-Darby canine kidney (MDCK) cells, and show that  
77 only one side of the MB is cleaved in most cases. We find that, once abscission is  
78 completed, the charged multivesicular body protein (CHMP) 4C subunit of the  
79 endosomal sorting complex required for transport (ESCRT) complex delays the

80 cleavage of the membrane of the other arm, allowing the MBR to remain on the cell  
81 surface as an organelle physically connected to the rest of the plasma membrane. The  
82 connection enables the MBR to license the centrosome for primary cilium assembly,  
83 and might be also important in other processes involving the MBR.

84

## 84 **Results**

### 85 **MBRs of MDCK cells are connected to the plasma membrane by a membranous** 86 **extension**

87 Epithelial MDCK cells constitute a paradigm of polarized epithelial cell  
88 (Rodriguez-Boulan et al., 2005). Given the important role of the MBR in MDCK cells,  
89 we chose this cell line as a model cell system to study whether there was continuity  
90 between the MBR and the rest of the cell. Unlike tumor-derived cell lines (Kuo et al.,  
91 2011, Ettinger et al., 2011), MDCK cells have a single MBR at most (Bernabe-Rubio et  
92 al., 2016, Bernabé-Rubio et al., 2019). Quantitative analysis indicates that >95% of  
93 MBRs are on the apical surface (Fig. S1A). Super-resolution structured illumination  
94 microscopy showed that MBRs are formed by the FB, which was visualized with the  
95 marker MKLP1, flanked by two small microtubule pools (Fig. 1A). It is of note that,  
96 unlike previous stages of the abscission process (Fig. S1B), the MBR did not show large  
97 microtubule bundles flanking the FB (Fig. 1A).

98 Abscission requires both the membrane and microtubules to be severed. Loss of  
99 tubulin staining on one side of the FB, coupled with the retraction of the structure, is  
100 considered a reliable indicator of the first membrane cleavage event. On the other side  
101 of the FB, however, additional techniques should be used to ascertain the integrity of  
102 the remaining membranous MB arm. SEM is a powerful tool for examining cell-surface  
103 topography. The most recent generation microscopes equipped with field emission tips  
104 and very-low-voltage (VLV) operation capabilities (incidence electron beam energy  $E_0$   
105  $\leq 1$  keV) allow direct, high-resolution imaging of cells on glass substrates without the  
106 need for metal coating (Wuhrer and Moran, 2016). To investigate the existence of a  
107 membranous stalk connecting the MBR membrane and the plasma membrane, we used  
108 correlative light microscopy and VLV SEM (CLEM) in subconfluent cultures of cells  
109 stably expressing GFP-tubulin (Fig. S1C, D). Light microscopy, on the one hand,  
110 allows selection of MBR candidate structures by the strong labeling of the FB with  
111 GFP-tubulin, discarding native MBs or MB-derived structures that still maintain  
112 microtubule bundles flanking the FB. Inspection of the candidate structures by VLV  
113 SEM, on the other hand, identified unambiguously *bona fide* MBRs by their typical  
114 morphology (87 of 117 structures analyzed). As revealed by CLEM, MBRs have a  
115 morphology consisting of a central “core” region, which corresponds to the bulge  
116 observed by transmission EM that contains the FB (Byers and Abramson, 1968),

117 flanked by two opposed conical structures (Fig. 1B). In top-view images, some of the  
118 MBRs examined have an evident membranous connection, emerging from one of the  
119 cones, with the plasma membrane (Fig. 1B, left panel) that is absent from other MBRs  
120 (Fig. S1E, left panel). After acquisition of a top-view image, the sample stage was tilted  
121 through 45° and rotated (Fig. S1F), making it possible to observe the MBR from  
122 different angles (right panels in Fig. 1B and Fig. S1E). We reasoned that the connection  
123 should restrict MBR movement in live cells in such a way that the MBR could move,  
124 defining a funnel-shaped volume whose narrowest end coincides with the connection  
125 point (Fig. 1C). To confirm the existence of the connection, we carried out time-lapse  
126 analysis of MBR movement and observed that this was the case (Fig. 1D, E and Video  
127 1). In summary, the two independent experimental approaches used support the  
128 existence of a physical connection between some MBRs and the plasma membrane.

### 129 **The membranous connection extends from the tip of the largest MBR cone**

130 The MBRs identified in our analysis were quantified and classified according to  
131 the existence of a membranous connection with the plasma membrane, the symmetry  
132 between the two cones, and the size of the cone from which the connection arises (Fig.  
133 2A, B). Top-view SEM images showed a clear connection with the plasma membrane in  
134 45/87 of the MBRs, whereas no discernible connection was found in 17/87 MBRs (Fig.  
135 2B). The remaining MBRs were classified as “unclear” because of their arrangement on  
136 the cell surface precludes the visualization of the possible connection in top-view  
137 images (Fig. S2A). The number of “informative” (45 + 17) top-view images of MBRs  
138 was considered sufficient to make further analysis of unclear cases unnecessary. The  
139 inclination angle formed by the long axis of the MBR and the cell surface observed for  
140 the unclear cases was more similar to that of the clearly connected MBRs than to those  
141 of the non-connected ones (Fig. S2B, C), suggesting the presence of a connection in  
142 most of the unclear cases. This observation implies that the observed fraction of  
143 connected MBRs with respect to the total “informative” cases (45/62) is likely an  
144 underestimate of the genuine fraction of connected MBRs.

145 A morphological feature of MBRs is the apparent degeneration of one of the  
146 cones. While one cone tends to have a defined form and size, the other is frequently  
147 shorter and rounder, giving rise to an asymmetrical MBR (Fig. 2A). It is of note that the  
148 connection arose from the larger cone in most (19/22) of the connected MBRs with  
149 asymmetrical cones (Fig. 2B).

150 To characterize the MBR, we measured the dimensions of the MBR using top-  
151 view SEM images. The FB has a homogeneous width regardless of the existence of a  
152 connection. Connected MBRs were longer and more variable in length than the non-  
153 connected ones, being the connected side longer than the opposite one (Fig. S2D, E).  
154 Independent measurements of the length based on MBR movement yielded similar  
155 values, supporting the validity of this approach (Fig. S2F-H).

156 In conclusion, the analyses presented so far indicate that MBRs display a number  
157 of prevalent structural features, the most common one being the presence of a  
158 membranous stalk presumably derived from the unresolved side of the bridge, which  
159 most often coincides with the largest cone, physically connecting the MBR membrane  
160 to the plasma membrane.

### 161 **The ESCRT machinery concentrates at the connection between the MBR and the** 162 **plasma membrane**

163 The final steps of the abscission process are carried out by the ESCRT  
164 machinery (Carlton and Martin-Serrano, 2007, Morita et al., 2007, Schoneberg et al.,  
165 2017), which progressively accumulates into rings at both sides of the FB (Elia et al.,  
166 2011). ESCRT-III assembles spiral polymers whose diameter decreases as they grow  
167 away from the FB, constricting the MB to the limit allowed by the microtubules inside.  
168 After microtubule clearance, the ESCRT polymer remodels generating a second ESCRT  
169 pool that is positioned at the future cleavage site (Elia et al., 2012, Goliand et al., 2018).

170 To investigate the involvement of ESCRT-III proteins in the cleavage of the  
171 membrane of the other MB arm, we expressed GFP-fused forms of the ESCRT proteins  
172 CHMP4B (GFP-L-CHMP4B) and CHMP4C (GFP-L-CHMP4C), and analyzed their  
173 localization before and after the end of the abscission process. These proteins, in which  
174 GFP is separated from CHMP4C and CHMP4B by a 25-nm long flexible linker, were  
175 previously shown to have the expected localization at the midbody, and their expression  
176 did not delay midbody abscission time (Ventimiglia et al., 2018, Sadler et al., 2018).  
177 Both proteins first accumulated in ring-like structures on both sides of the FB and then  
178 polymerized towards the abscission site, resulting in the appearance of cone-shaped  
179 staining in one of the MB arms. Once microtubules were cleared from this arm,  
180 membrane cleavage and, consequently, daughter cell separation occurred. After  
181 abscission, CHMP4B, CHMP4C and microtubules followed essentially the same  
182 sequence of events on the other side of the FB, generating an MBR (Fig. 3A,B; Fig.

183 S3A,B). The same was observed in a panel of endogenous ESCRT proteins (Fig. S3B).  
184 All MBRs contained ESCRT proteins (Fig. S3C) but the pattern of distribution was not  
185 the same in all MBRs. The MBRs that presented a similar pattern on both sides of the  
186 FB, mainly with staining only on the FB rims, were classified as “even” MBRs,  
187 whereas those that, in addition to the FB rims, had a second ESCRT pool in only one  
188 side of the FB were categorized as “uneven” MBRs. The second ESCRT pool in the  
189 uneven MBRs adopted the form of a cone, filament or dot (Fig. 3A, B; Fig. S3D).  
190 Quantitative analysis revealed that most MBRs display uneven ESCRT distribution  
191 (Fig. 3C). It is of particular note that the MBR side with the extra ESCRT pool  
192 coincides with that having the membranous stalk. This pool is present in a region of the  
193 connection proximal to the plasma membrane, as determined by CLEM of cells stably  
194 expressing Cherry-tubulin and GFP-L-CHMP4C (Fig. 3D-F) or GFP-L-CHMP4B (Fig.  
195 3F; Fig. S3E, F). Supporting this localization, time-lapse analysis of MBR movement  
196 showed that the pool remained immobile, as may be seen in the projected kymograph,  
197 whereas the distal pool, which corresponds to the FB rims, moved drawing a circle  
198 around it (Fig. 3G).

199 In summary, ESCRT proteins localize to the membranous stalk that connects the  
200 MBR to the plasma membrane and have a similar distribution to that found in pre-  
201 abscission stages right before the MB arm is first cleaved (Goliand et al., 2018). Since  
202 the presence of an ESCRT pool distant from that surrounding the FB has been  
203 associated with the last stage of membrane cleavage (Goliand et al., 2018), we  
204 proceeded to analyze how the cleavage of the connection is prevented.

### 205 **CHMP4C depletion reduces the percentage of cells with an MBR and impairs** 206 **primary ciliogenesis**

207 The abscission checkpoint delays abscission by regulating the ESCRT machinery  
208 in the case of mitotic problems, such as persisting chromatin within the bridge,  
209 incomplete nuclear pore reformation, or tension in the bridge produced by opposite  
210 pulling forces from the daughter cells (Agromayor and Martin-Serrano, 2013, Caballe et  
211 al., 2015). The activation of the abscission checkpoint retards abscission by promoting  
212 the phosphorylation of the ESCRT-III subunit CHMP4C by the kinase Aurora B,  
213 Ser210 being the major phospho-acceptor residue (Carlton et al., 2012). To investigate  
214 the involvement of this mechanism in the regulation of the second cleavage of the MB,  
215 we used specific siRNA (siCHMP4C) to knockdown CHMP4C expression (Fig. S4A,



216 B). As a control, we observed that CHMP4C knockdown accelerated abscission without  
217 affecting the number of dividing cells (Fig. 4A and Fig. S4C), as has been previously  
218 been noted in other cell lines (Carlton et al., 2012, Sadler et al., 2018, Caballe et al.,  
219 2015). It is of note that the percentage of cells with an MBR was much lower in cells  
220 deficient in CHMP4C expression (Fig. 4B, S4E, F), being >95% of the MBRs on the  
221 cell surface as they are in control cells (Fig. S1A). This result argues against the  
222 possibility that the loss of MBRs in CHMP4C-deficient cells was due to MBR  
223 internalization and degradation. The CHMP4C mutants S210A and A232T, which is a  
224 CHMP4C allele associated with increased susceptibility to cancer, are unable to replace  
225 endogenous CHMP4C in abscission regulation (Carlton et al., 2012, Sadler et al., 2018).  
226 The effect of CHMP4C knockdown was rescued by the exogenous expression of  
227 siCHMP4C-resistant forms of GFP fusions of wild type but not of the S210A and  
228 A232T CHMP4C mutants (Fig. 4B and Fig. S4D-F). The percentage of MBRs positive  
229 for the mutants (Fig. S4G), their distribution within the MBR (Fig. S4H), and the total  
230 number of cells per field (Fig. S4I) were similar to those of the wild-type CHMP4C  
231 protein (Fig. 3C, Fig. S3C, Fig. S4I). As a control, we observed that the number of cells  
232 connected by a midbody decreased in siCHMP4C-treated cells and that this effect was  
233 corrected by the intact protein but not by the S210A or A232T CHMP4C mutants (Fig.  
234 S4J). The results illustrated in Fig. 4A,B and Fig. S4 are similar to those reported for  
235 CHMP4C in the control of the first cut of the MB membrane by the abscission  
236 checkpoint mechanism (Carlton et al., 2012, Capalbo et al., 2012) and suggest that  
237 CHMP4C has a similar role in the second cut.

238 Since the MBR licenses primary cilium formation in polarized epithelial cells  
239 (Bernabe-Rubio et al., 2016), we examined the effect of CHMP4C knockdown on this  
240 process. We observed a dramatic drop in the percentage of ciliated cells (Fig. 4C, D),  
241 which is consistent with the loss of MBRs in CHMP4C-deficient cells (Fig. 4B). This  
242 result is in agreement with a previous report showing that the physical removal of the  
243 MBR greatly reduces primary ciliogenesis (Bernabe-Rubio et al., 2016) and further  
244 highlights the importance of the MBR in this process by providing a genetic evidence of  
245 the requirement for MBR in primary cilium formation by polarized epithelial cells.

246

## 246 Discussion

247 Although the FB was first described more than 125 years ago, the discovery of  
248 its role in abscission is relatively recent, and even more so is the evidence of important  
249 post-mitotic roles for the MBR (Chen et al., 2013). Accumulation of MBRs has been  
250 associated with increased cell reprogramming efficiency of stem cells and *in vitro*  
251 tumorigenicity of cancer cells (Kuo et al., 2011, Ettinger et al., 2011). In polarized  
252 epithelial cells, the MBR meets the centrosome at the center of the apical membrane and  
253 enables the centrosome for primary cilium formation (Bernabe-Rubio et al., 2016).  
254 Using CLEM, we identified a membranous stalk in polarized epithelial MDCK cells  
255 that physically connects the MBR membrane and the plasma membranes of most MBR-  
256 containing cells. The stalk is derived from the unresolved side of the bridge and  
257 contains ESCRT machinery, including the regulatory subunit CHMP4C. The  
258 knockdown of CHMP4C expression causes the loss of the MBR and, consistent with its  
259 role in primary cilium formation, a dramatic reduction in the percentage of ciliated cells.  
260 These results indicate that an MBR physically connected to the plasma membrane by a  
261 membranous stalk, whose integrity is regulated by CHMP4C, is the form of MBR used  
262 by MDCK cells to license primary ciliogenesis.

263 We first identified candidate MBR structures from the presence of GFP-tubulin  
264 in the MB core and its absence from the two MB arms. The selected structures were  
265 analyzed in a state-of-the-art, VLV SEM using samples that were prepared by a gentle  
266 procedure (Katsen-Globa et al., 2016) omitting conductive coating. This equipment  
267 revealed the subnanometric topography of MBRs, which enabled structures without the  
268 typical MBR morphology to be discounted. Using this approach, we visualized a  
269 membranous stalk between the MBR and the plasma membrane in a large proportion of  
270 MBRs. However, such a connection was not observed in a previous CLEM study  
271 (Crowell et al., 2014) that combined phase-contrast microscopy to identify MBR  
272 candidates, sample preparation by standard procedures, and analysis under conventional  
273 SEM equipment (Fremont and Echard, 2017). The discrepancy between the two studies  
274 might be due to the different cell lines analyzed —HeLa cells in Crowell et al. (2014)  
275 and MDCK cells in ours— or to the distinct protocols for sample preparation and the  
276 SEM equipments used. In addition to detecting the connection, our CLEM analysis  
277 revealed that one of the MBR cones is larger than the other, likely because the shorter  
278 one results from the degeneration of the cone on the side where abscission occurs.

279 Consistent with this possibility, we observed that the connecting stalk most often arises  
280 from the largest cone of the MBR. The presence of a membranous connection with the  
281 plasma membrane in MBRs argues against the use of the loss of microtubules on both  
282 sides of the FB as an indicator of bilateral MB membrane cleavage. In addition, the use  
283 of phase-contrast microscopy cannot distinguish between connected and unconnected  
284 MBRs because the connection is very small. Therefore, cautious must be exercised  
285 when such criteria are the only ones used to assess the second cleavage of the MB  
286 membrane.

287 We observed that most MBRs contained ESCRT polymers only on the side  
288 corresponding to the largest cone, similar to those present just before the first cleavage  
289 of the MB membrane. We mapped the ESCRT pool at the membranous connection  
290 between the MBR and the plasma membrane by CLEM, and confirmed the localization  
291 by analyzing the MBR motion. This location of ESCRT proteins is consistent with the  
292 presence of helical filaments in the unresolved MB arm, as observed by soft X-ray  
293 cryotomography (Sherman et al., 2016). This pool contains CHMP4C, which is a  
294 crucial component of the checkpoint mechanism that delays abscission when mitotic  
295 problems occur. In those cases, the knockdown of CHMP4C accelerates abscission and  
296 only the expression of wild type CHMP4C but not of the CHMP4C S210A or A232T  
297 mutants can substitute the endogenous protein to delay membrane cleavage. Since the  
298 number of cells with an MBR was greatly diminished in CHMP4C-knockdown cells  
299 and the effect was corrected by expression of intact CHMP4C but not by CHMP4C  
300 mutants, we propose that, similar to its role in the abscission checkpoint (Carlton et al.,  
301 2012, Capalbo et al., 2012), CHMP4C allows MBRs to remain connected to the plasma  
302 membrane by delaying the cleavage of the connection.

303 Our previous study on primary cilium biogenesis indicated that the MBR  
304 prepares the centrosome for primary cilium assembly in cells, such as MDCK cells, in  
305 which the primary cilium is entirely assembled in the plasma membrane (Bernabé-  
306 Rubio et al., 2016). The existence of the physical connection might facilitate the  
307 directional movement of the MBR to the middle of the apical membrane to meet the  
308 centrosome by direct anchoring to the cytoskeleton. In addition, the continuity of the  
309 MBR with the rest of the plasma membrane makes possible the delivery of MBR-  
310 associated membranes to the centrosome for the assembly of the ciliary membrane  
311 (Bernabé-Rubio et al., 2019). Since we found that a functional consequence of the loss

312 of the connection caused by CHMP4C silencing is the impairment of primary  
313 ciliogenesis, we conclude that the connection is required to prepare the centrosome for  
314 primary ciliogenesis.

315 The relationship between the MBR membrane and the plasma membrane  
316 resembles that of the primary cilium, since the ciliary membrane is continuous with, but  
317 different from, the rest of the plasma membrane. The ciliary membrane harbors a large  
318 variety of important receptors for cell signaling, including receptors involved in cell  
319 growth, migration, development and differentiation (Gerdes et al., 2009, Ishikawa and  
320 Marshall, 2011, Singla and Reiter, 2006). Given the continuity of the MBR membrane  
321 and the plasma membrane, it could be that the remnant of an ancient cytokinetic  
322 intercellular bridge developed some of the ciliary functions before the cilium emerged  
323 during evolution, and that the remnant itself promoted the transition by facilitating the  
324 appearance of the cilium through a mechanism reminiscent of its role in primary cilium  
325 formation in polarized epithelial cells.

326 In conclusion, our study reveals that the majority of MBRs inherited in MDCK  
327 cells are physically connected to the plasma membrane through a membranous stalk  
328 derived from the unresolved side of the cytokinetic bridge. The ESCRT subunit  
329 CHMP4C controls the integrity of the other MB arm to ensure the continuity between  
330 the MBR membrane and the plasma membrane and, in this way, the MBR facilitates  
331 primary cilium formation.

332

## 332 **Materials and Methods**

333 **Antibodies.** The sources of the antibodies to the different markers were as follows: total  
334  $\alpha$ -tubulin (mouse mAb IgG1, clone DM1A, product T6199; used at 1/5,000),  
335 tyrosinated  $\alpha$ -tubulin (rat mAb IgG2a, clone YL1/2, product MAB1864; used at 1/200),  
336 acetylated tubulin (mouse mAb IgG2b; clone 6-11-B1, product T7451; used at 1/500)  
337 and CHMP1B (rabbit polyclonal antibody, ATLAS product HPA061997; used at 1/500)  
338 were from Merck; CHMP2A (rabbit polyclonal, product 10477-1-AP; used at 1/500)  
339 was from Proteintech; CHMP1A (rabbit polyclonal, product ab178686; used at 1/500)  
340 was from Abcam; PRC1 (mouse mAb IgG2b, clone 16F2, product MA1-846; used at  
341 1/100) was from ThermoFisher Scientific; MKLP1 (rabbit polyclonal, product sc-867;  
342 used at 1/100) was from Santa Cruz; GFP (mouse mAbs IgG $\kappa$ , mixture of clones 7.1  
343 and 13.1, product 11814460001; used at 1:1,000) was from Roche. The rabbit  
344 polyclonal antibody to CHMP4C was prepared by Lampire Biologicals and used at  
345 1/200. The rabbit polyclonal antibodies to ALIX (used at 1/500) and IST1 (used at  
346 1/1,000) (Bajorek et al., 2009) were generous gifts from Wesley Sundquist (University  
347 of Utah). Secondary antibodies conjugated to Alexa-488, -594 or -647 were from  
348 Thermo Fisher Scientific.

349 **Cell culture.** Epithelial canine MDCK II (CRL2936) cells were obtained from the  
350 ATCC and grown in MEM supplemented with 5% FBS (Merck) at 37°C in an  
351 atmosphere of 5% CO<sub>2</sub>. Mycoplasma testing was regularly performed. For  
352 immunofluorescence and quantitative analysis, 3.0x10<sup>4</sup> cells were plated onto coverslips  
353 maintained in 24-well multiwell plates and grown for 48 h. For correlative light and  
354 electron microscopy and time-lapse studies 1.5x10<sup>5</sup> cells were plated onto 35-mm glass-  
355 bottom plates (MatTek) and grown for 48 h.

356 **DNA constructs, siRNA and transfection conditions.** The DNA constructs expressing  
357 EGFP- or mCherry-tubulin were from Takara Bio, Inc. MDCK II cells stably expressing  
358 these proteins were generated by transfection of 1.0x10<sup>6</sup> cells with Amaxa Nucleofector  
359 II (Lonza) using the L-005 program. After selection with 2 mg/ml G-418 (Thermo  
360 Fisher Scientific), the resulting clones were screened under a fluorescence microscope.  
361 The retroviral constructs pNG72-GFP-L-CHMP4B, pNG72-GFP-L-CHMP4C, pNG72-  
362 GFP-L-CHMP4C A232T have been described previously (Ventimiglia et al., 2018,  
363 Sadler et al., 2018). pNG72-GFP-L-CHMP4C S210A was generated by site-directed  
364 mutagenesis using a commercial kit (Quickchange Lightning, Agilent Technologies).

365 For retroviral production, 293T cells were co-transfected with the indicated retroviral  
366 construct and with the retroviral packaging vectors, MLV-GagPol/pHIV 8.1 and pHIT  
367 VSVg at a ratio of 2:3:1 for 48 h using polyethylenimine (Polysciences, Germany).  
368 293T supernatant was collected and filtered through a 0.2- $\mu$ m filter before being used to  
369 transduce MDCK II cells. For siRNA assays,  $3.0 \times 10^4$  cells were transfected with 100  
370 nM siRNA non-targeting (siNT) or custom siRNA targeted to dog CHMP4C  
371 (siCHMP4C, 5'-CTCGCTCAGATTGATGGCACA-3'; ThermoFisher Scientific)  
372 (Carlton et al., 2012) using Lipofectamine 2000 (Thermo Fisher Scientific) according to  
373 the manufacturer's recommendations. Cells were transfected twice, 48 h and 6 h before  
374 the beginning of the experiments. The pSuperGFP-shCHMP4C construct, which  
375 expresses GFP and shRNA to dog CHMP4C simultaneously from independent  
376 promoters, was generated by cloning a synthetic DNA duplex with the same target  
377 sequence as siCHMP4C into the pSuper plasmid (OligoEngine). The resulting plasmid  
378 was combined with the plasmid pEGFP-N1 using the unique EcoO109I and Afl III sites  
379 present in both plasmids.

380 **Confocal microscopy.** Cells were fixed in cold methanol for 5 min and blocked with  
381 3% (wt/vol) BSA for 30 min. Cells were incubated with the indicated primary  
382 antibodies at 4°C overnight, and were washed and then stained with the appropriate  
383 fluorescent secondary antibodies. Coverslips were mounted using ProLong Gold  
384 antifade reagent (ThermoFisher Scientific). Super-resolution images were obtained  
385 using a Nikon N-SIM-S superresolution microscope with a 100x oil immersion  
386 objective (Numerical aperture, NA, of 1.49) and processed with NIS-Elements. A stack  
387 containing the whole cell was acquired in 3D-SIM imaging mode. Maximum intensity  
388 projections of the entire stack are shown. Images for ESCRT localization analysis were  
389 acquired with an LSM 800 confocal microscope (Zeiss) equipped with a 63x oil  
390 immersion objective (NA 1.4) and a Nikon Eclipse Ti-E inverted CSU-X1 spinning disk  
391 confocal microscope equipped with a 100x oil immersion objective (NA 1.4). The  
392 images shown are the sums of the planes containing the structure of interest. To analyze  
393 the distribution of ESCRT proteins in MBRs, Z-stack images of subconfluent cultures  
394 were acquired with a Zeiss LSM800 confocal microscope equipped with a 63x oil  
395 immersion lens (NA 1.4).

396 **Time-lapse confocal imaging.** Cells were seeded on 35-mm glass-bottom dishes as  
397 mentioned above and maintained in MEM without phenol red during recording. Time-

398 lapse experiments showing midbody remnant motion were acquired with a Nikon A1R+  
399 confocal microscope with a 60x water objective (NA 1.2). A stack containing the whole  
400 structure was captured every second using a resonant scanner, and the resulting images  
401 were deconvoluted with Huygens software (SVI) to enhance the signal-to-noise ratio.  
402 3D reconstructions were generated in NIS-Elements software (Nikon). To quantify  
403 motion confinement, a single plane was acquired every second for 3 min with a Nikon  
404 Eclipse Ti-E inverted CSU-X1 spinning disk confocal microscope equipped with a 100x  
405 oil immersion objective (NA 1.4). The position of the structure was determined in every  
406 frame, and the geometrical center of every dataset calculated. From that point, a circle  
407 that included 95% of the points was delineated and used to calculate the length of the  
408 MBR connection.

409 **Correlative light and scanning electron microscopy.** Prior to cell seeding, 250-nm  
410 gold nanobeads (BBI Solutions) were deposited over a 35-mm glass-bottom plate pre-  
411 coated with polylysine ( $1.0 \times 10^4$  beads/mm<sup>2</sup>) to serve as fiducial markers. Reference  
412 marks were made on the coverslip to localize the imaging area and maintain sample  
413 orientation between the two imaging methods used. Then, MDCK cells stably  
414 expressing either GFP-tubulin alone or Cherry-tubulin plus either GFP-L-CHMP4B or  
415 GFP-L-CHMP4C were seeded as described above. After 48 h of cell growth, cells were  
416 pre-fixed with a volume of 2x fixing solution (4% paraformaldehyde plus 4%  
417 glutaraldehyde in phosphate buffer) equal to that of the culture medium for 10 min at  
418 room temperature, followed by 3 h incubation with 1x fixing solution. For the confocal  
419 microscopy component, a Nikon A1R+ confocal microscope with a 60x water objective  
420 (NA 1.2) was used. First, a low-magnification image was acquired for alignment and  
421 navigation purposes, including the fluorescence signal and a reflection channel showing  
422 the position of the gold nanobeads. Candidate MBR structures selected by the absence  
423 of tubulin label at the FB sides were identified and high-resolution images were  
424 acquired when needed. The samples for SEM analysis were prepared by a gentle  
425 procedure adapted from Katsen-Globa et al. (2016) that avoids conventional treatments,  
426 such as osmium post-fixation, critical-point desiccation, and sputter coating with gold,  
427 that could alter the cell-surface topography and that are used in sample preparation for  
428 analysis under conventional SEM equipments. Briefly, the cells in the coverslip were  
429 dehydrated by immersion in increasing concentrations of ethanol (10% increments up to  
430 100%, 3 min per solution). After dehydration, ethanol was substituted by

431 hexamethyldisilazane (HMDS, Sigma-Aldrich) by sequential 3 min incubation in a 1:1  
432 ethanol-HMDS solution and pure HMDS. The samples were air-dried overnight. Then,  
433 the coverslip was attached to a sample holder with carbon adhesive tape and encircled  
434 with copper foil to reduce charge accumulation. Scanning electron microscopy images  
435 were acquired with ultra-high resolution FEI Verios 460 field-emission SEM equipment  
436 with a calibrated resolution below 0.6 nm at 1 keV landing energy. This equipment  
437 allows obtaining more surface detail, creating less beam damage, and reducing charging  
438 effects compared with conventional SEM equipments. Sample orientation was first  
439 adjusted using the in-chamber camera and reference marks, and the imaging area  
440 localized. A low-magnification image matching the one acquired under the confocal  
441 microscope was acquired, and the position of the gold nanobeads identified. The pattern  
442 formed by the cells over the substrate was first used for rough alignment, and the  
443 position of the gold nanobeads was then used to refine the alignment, facilitating the  
444 identification of the structures of interest. VLV SEM images of the selected structures  
445 were acquired at 1 keV with a current of 13 pA by an in-lens secondary electron  
446 detector. To observe the structure of interest from different angles, the sample stage was  
447 tilted through 45° and rotated in 30° increments (Fig. S1F). Finally, 3D reconstructions  
448 of the corresponding confocal images were generated in NIS-Elements (Nikon) and  
449 rotated to match the orientation of their corresponding SEM counterparts.

450 **Midbody remnant characterization and size analysis.** A top-view SEM image was  
451 acquired for every candidate structure identified as an MBR by CLEM. MBRs showing  
452 continuity between the plasma membrane and the end of one of the cones flanking the  
453 MB were classified as connected MBRs. For symmetry analysis, the overall size of both  
454 regions flanking the FB was considered. The actual length of the MBR long axis was  
455 calculated from distance and angle measurements taken from top-view images (Fig.  
456 S2B) as follows:

$$\alpha = \sin^{-1} \frac{2 \times (E - F)}{C - D} \quad \beta = 90 - \alpha \quad L = \frac{A - B}{\cos \beta}$$

457

458 **Abcission timing quantification.** Cells were seeded on glass-bottom 24-well plates  
459 (MatTek) and transfected with siRNA as previously described. Imaging was carried out  
460 with a 40x dry objective lens (NA 0.75) on a Nikon Ti-Eclipse wide-field inverted  
461 microscope controlled by NIS-Elements software (Nikon). Cells were kept at 37°C and



462 5% CO<sub>2</sub> in an environmental chamber and imaged every 10 min for 24 h. The time  
463 period between the formation of the midbody and abscission was considered as the  
464 abscission time.

465 **Immunoprecipitation and immunoblotting.** MDCK II cells stably expressing GFP-L-  
466 CHMP4C variants were lysed at 4°C in 1 ml lysis buffer containing 50 mM Tris, pH  
467 7.4, 150 mM NaCl, 5 mM EDTA, 5% glycerol, 1% Triton X-100 and a protease  
468 inhibitor cocktail (Merck, product 11697498001) Lysates were sonicated and  
469 centrifuged for 10 min, the cleared supernatant was then incubated with anti-GFP  
470 coupled magnetic microparticles (GFP-Trap, ChromoTek) for 2 h followed by four  
471 washing steps. Bound proteins were eluted in Laemmli's buffer and boiled before SDS-  
472 PAGE and immunoblotting.

473 **Ciliogenesis assay.** MDCK II cells were transfected with the plasmid (pSuperGFP-  
474 shCHMP4C) or an empty vector (pSuperGFPN1) using Amaxa nucleofector.  $9.0 \times 10^5$   
475 cells were plated on 12 mm Transwell permeable supports (Corning) and cultured for 72  
476 h. Samples were processed for immunofluorescence analysis and imaged with a Zeiss  
477 LSM510 confocal microscope equipped with a 63x oil immersion lens (NA 1.4). The  
478 percentages of ciliated cells were determined for GFP-positive and -negative cells, and  
479 used to calculate the ratio between them.

480 **Statistical analysis.** All graphs were produced and statistical analysis performed with  
481 Prism software (GraphPad). Statistical significance was assessed with a two-tailed  
482 Student's unpaired t-test. Additional information is shown in figure legends.

## 483 **ACKNOWLEDGEMENTS**

484 The expert technical advice of the Optical and Confocal Microscopy Facility of  
485 CBMSO is gratefully acknowledged. We thank Dr Phil Mason for revising the English  
486 language of the manuscript, Laura Fernandez-Martín for invaluable technical help and  
487 David Esteban-Mendoza for his contribution to optimization of the SEM protocol.  
488 This work was supported by a grant (PGC2018-095643-B-I00) to MAA from the  
489 Spanish Ministerio de Ciencia, Innovación y Universidades, Agencia Estatal de  
490 Investigación, y Fondo Europeo de Desarrollo Regional, European Union  
491 (MCIU/AEI/FEDER, UE), and by Wellcome Trust funding (WT102871MA) to JM-S.  
492 We also acknowledge the Micro and Nanofabrication Laboratory of the Instituto de  
493 Micro y Nanotecnología (MiNa), which is funded by the Comunidad de Madrid

494 (S2018/NMT-4291 TEC2SPACE), MCIU (project CSIC13-4E-1794) and EU  
495 (FEDER, FSE), for invaluable help on SEM. A contract from MCIU (FPU14/00295)  
496 and a short-term fellowship from EMBO to JC-A are also acknowledged. The authors  
497 declare no competing interests.

498

498 **References**

499

500 Agromayor, M. & Martin-Serrano, J. 2013. Knowing when to cut and run: mechanisms  
501 that control cytokinetic abscission. *Trends Cell Biol*, 23, 433-41. doi:  
502 10.1016/j.tcb.2013.04.006.

503

504 Bajorek, M., Morita, E., Skalicky, J. J., Morham, S. G., Babst, M. & Sundquist, W. I.  
505 2009. Biochemical analyses of human IST1 and its function in cytokinesis. *Mol*  
506 *Biol Cell*, 20, 1360-73. doi: 10.1091/mbc.E08-05-0475.

507

508 Bernabe-Rubio, M., Andres, G., Casares-Arias, J., Fernandez-Barrera, J., Rangel, L.,  
509 Reglero-Real, N., Gershlick, D. C., Fernandez, J. J., Millan, J., Correas, I.,  
510 Miguez, D. G. & Alonso, M. A. 2016. Novel role for the midbody in primary  
511 ciliogenesis by polarized epithelial cells. *J Cell Biol*, 214, 259-73. doi:  
512 10.1083/jcb.201601020.

513

514 Bernabé-Rubio, M., Bosch-Fortea, M., García, E., de la Serna, J. B. & Alonso, M. A.  
515 2019. The ciliary membrane of polarized epithelial cells stems from a midbody  
516 remnant-associated membrane patch with condensed nanodomains. *bioRxiv*,  
517 667642. doi: 10.1101/667642.

518

519 Byers, B. & Abramson, D. H. 1968. Cytokinesis in HeLa: post-telophase delay and  
520 microtubule-associated motility. *Protoplasma*, 66, 413-35.

521

522 Caballe, A., Wenzel, D. M., Agromayor, M., Alam, S. L., Skalicky, J. J., Kloc, M.,  
523 Carlton, J. G., Labrador, L., Sundquist, W. I. & Martin-Serrano, J. 2015. ULK3  
524 regulates cytokinetic abscission by phosphorylating ESCRT-III proteins. *Elife*,  
525 4, e06547. doi: 10.7554/eLife.06547.

526

527 Capalbo, L., Montembault, E., Takeda, T., Bassi, Z. I., Glover, D. M. & D'Avino, P. P.  
528 2012. The chromosomal passenger complex controls the function of endosomal  
529 sorting complex required for transport-III Snf7 proteins during cytokinesis.  
530 *Open Biol*, 2, 120070. doi: 10.1098/rsob.120070.

531

532 Carlton, J. G., Caballe, A., Agromayor, M., Kloc, M. & Martin-Serrano, J. 2012.  
533 ESCRT-III governs the Aurora B-mediated abscission checkpoint through  
534 CHMP4C. *Science*, 336, 220-5. doi: 10.1126/science.1217180.

535

536 Carlton, J. G. & Martin-Serrano, J. 2007. Parallels between cytokinesis and retroviral  
537 budding: a role for the ESCRT machinery. *Science*, 316, 1908-12. doi:  
538 10.1126/science.1143422.

539

540 Chen, C. T., Ettinger, A. W., Huttner, W. B. & Doxsey, S. J. 2013. Resurrecting  
541 remnants: the lives of post-mitotic midbodies. *Trends Cell Biol*, 23, 118-28. doi:  
542 10.1016/j.tcb.2012.10.012.

543

544 Crowell, E. F., Gaffuri, A. L., Gayraud-Morel, B., Tajbakhsh, S. & Echard, A. 2014.  
545 Engulfment of the midbody remnant after cytokinesis in mammalian cells. *J Cell*  
546 *Sci*, 127, 3840-51. doi: 10.1242/jcs.154732.

547

- 548 Dionne, L. K., Wang, X. J. & Prekeris, R. 2015. Midbody: from cellular junk to  
549 regulator of cell polarity and cell fate. *Curr Opin Cell Biol*, 35, 51-8. doi:  
550 10.1016/j.ceb.2015.04.010.
- 551 Elia, N., Fabrikant, G., Kozlov, M. M. & Lippincott-Schwartz, J. 2012. Computational  
552 model of cytokinetic abscission driven by ESCRT-III polymerization and  
553 remodeling. *Biophys J*, 102, 2309-20. doi: 10.1016/j.bpj.2012.04.007.  
554
- 555 Elia, N., Sougrat, R., Spurlin, T. A., Hurley, J. H. & Lippincott-Schwartz, J. 2011.  
556 Dynamics of endosomal sorting complex required for transport (ESCRT)  
557 machinery during cytokinesis and its role in abscission. *Proc Natl Acad Sci U S*  
558 *A*, 108, 4846-51. doi: 10.1073/pnas.1102714108.  
559
- 560 Ettinger, A. W., Wilsch-Brauninger, M., Marzesco, A. M., Bickle, M., Lohmann, A.,  
561 Maliga, Z., Karbanova, J., Corbeil, D., Hyman, A. A. & Huttner, W. B. 2011.  
562 Proliferating versus differentiating stem and cancer cells exhibit distinct  
563 midbody-release behaviour. *Nat Commun*, 2, 503. doi: 10.1038/ncomms1511.  
564
- 565 Fededa, J. P. & Gerlich, D. W. 2012. Molecular control of animal cell cytokinesis. *Nat*  
566 *Cell Biol*, 14, 440-7. doi: 10.1038/ncb2482.  
567
- 568 Fremont, S. & Echard, A. 2017. Studying cytokinesis and midbody remnants using  
569 correlative light/scanning EM. *Methods Cell Biol*, 137, 239-251. doi:  
570 10.1016/bs.mcb.2016.03.028.  
571
- 572 Gerdes, J. M., Davis, E. E. & Katsanis, N. 2009. The vertebrate primary cilium in  
573 development, homeostasis, and disease. *Cell*, 137, 32-45. doi:  
574 10.1016/j.cell.2009.03.023.  
575
- 576 Goliand, I., Adar-Levor, S., Segal, I., Nachmias, D., Dadosh, T., Kozlov, M. M. & Elia,  
577 N. 2018. Resolving ESCRT-III spirals at the intercellular bridge of dividing  
578 cells using 3D STORM. *Cell Rep*, 24, 1756-1764. doi:  
579 10.1016/j.celrep.2018.07.051.  
580
- 581 Ishikawa, H. & Marshall, W. F. 2011. Ciliogenesis: building the cell's antenna. *Nat Rev*  
582 *Mol Cell Biol*, 12, 222-34. doi: 10.1038/nrm3085.  
583
- 584 Katsen-Globa, A., Puetz, N., Gepp, M. M., Neubauer, J. C. & Zimmermann, H. 2016.  
585 Study of SEM preparation artefacts with correlative microscopy: Cell shrinkage  
586 of adherent cells by HMDS-drying. *Scanning*, 38, 625-633. doi:  
587 10.1002/sca.21310.  
588
- 589 Kuo, T. C., Chen, C. T., Baron, D., Onder, T. T., Loewer, S., Almeida, S., Weismann,  
590 C. M., Xu, P., Houghton, J. M., Gao, F. B., Daley, G. Q. & Doxsey, S. 2011.  
591 Midbody accumulation through evasion of autophagy contributes to cellular  
592 reprogramming and tumorigenicity. *Nat Cell Biol*, 13, 1214-23. doi:  
593 10.1038/ncb2332.  
594
- 595 Lujan, P., Rubio, T., Varsano, G. & Kohn, M. 2017. Keep it on the edge: The post-  
596 mitotic midbody as a polarity signal unit. *Commun Integr Biol*, 10, e1338990.  
597 doi: 10.1080/19420889.2017.1338990.

- 598  
599 Mierzwa, B. & Gerlich, D. W. 2014. Cytokinetic abscission: molecular mechanisms and  
600 temporal control. *Dev Cell*, 31, 525-38. doi: 10.1016/j.devcel.2014.11.006.  
601
- 602 Morita, E., Sandrin, V., Chung, H. Y., Morham, S. G., Gygi, S. P., Rodesch, C. K. &  
603 Sundquist, W. I. 2007. Human ESCRT and ALIX proteins interact with proteins  
604 of the midbody and function in cytokinesis. *EMBO J*, 26, 4215-27. doi:  
605 10.1038/sj.emboj.7601850.  
606
- 607 Ou, G., Gentili, C. & Gonczy, P. 2014. Stereotyped distribution of midbody remnants in  
608 early *C. elegans* embryos requires cell death genes and is dispensable for  
609 development. *Cell Res*, 24, 251-3. doi: 10.1038/cr.2013.140.  
610
- 611 Rodriguez-Boulan, E., Kreitzer, G. & Musch, A. 2005. Organization of vesicular  
612 trafficking in epithelia. *Nat Rev Mol Cell Biol*, 6, 233-47. doi: 10.1038/nrm1593.  
613
- 614 Sadler, J. B. A., Wenzel, D. M., Williams, L. K., Guindo-Martinez, M., Alam, S. L.,  
615 Mercader, J. M., Torrents, D., Ullman, K. S., Sundquist, W. I. & Martin-  
616 Serrano, J. 2018. A cancer-associated polymorphism in ESCRT-III disrupts the  
617 abscission checkpoint and promotes genome instability. *Proc Natl Acad Sci U S*  
618 *A*, 115, E8900-E8908. doi: 10.1073/pnas.1805504115.  
619
- 620 Schiel, J. A., Park, K., Mophew, M. K., Reid, E., Hoenger, A. & Prekeris, R. 2011.  
621 Endocytic membrane fusion and buckling-induced microtubule severing mediate  
622 cell abscission. *J Cell Sci*, 124, 1411-24. doi: 10.1242/jcs.081448.  
623
- 624 Schoneberg, J., Lee, I. H., Iwasa, J. H. & Hurley, J. H. 2017. Reverse-topology  
625 membrane scission by the ESCRT proteins. *Nat Rev Mol Cell Biol*, 18, 5-17.  
626 doi: 10.1038/nrm.2016.121.  
627
- 628 Sherman, S., Kirchenbuechler, D., Nachmias, D., Tamir, A., Werner, S., Elbaum, M. &  
629 Elia, N. 2016. Resolving new ultrastructural features of cytokinetic abscission  
630 with soft-X-ray cryo-tomography. *Sci Rep*, 6, 27629. doi: 10.1038/srep27629.  
631
- 632 Singla, V. & Reiter, J. F. 2006. The primary cilium as the cell's antenna: signaling at a  
633 sensory organelle. *Science*, 313, 629-33. doi: 10.1126/science.1124534.  
634
- 635 Ventimiglia, L. N., Cuesta-Geijo, M. A., Martinelli, N., Caballe, A., Macheboeuf, P.,  
636 Miguet, N., Parnham, I. M., Olmos, Y., Carlton, J. G., Weissenhorn, W. &  
637 Martin-Serrano, J. 2018. CC2D1B coordinates ESCRT-III activity during the  
638 mitotic reformation of the nuclear envelope. *Dev Cell*, 47, 547-563 e6. doi:  
639 10.1016/j.devcel.2018.11.012.  
640
- 641 Wuhrer, R. & Moran, K. 2016. Low voltage imaging and X-ray microanalysis in the  
642 SEM: challenges and opportunities. *IOP Conference Series: Materials Science*  
643 *and Engineering*, 109, 012019. doi: 10.1088/1757-899x/109/1/012019.  
644

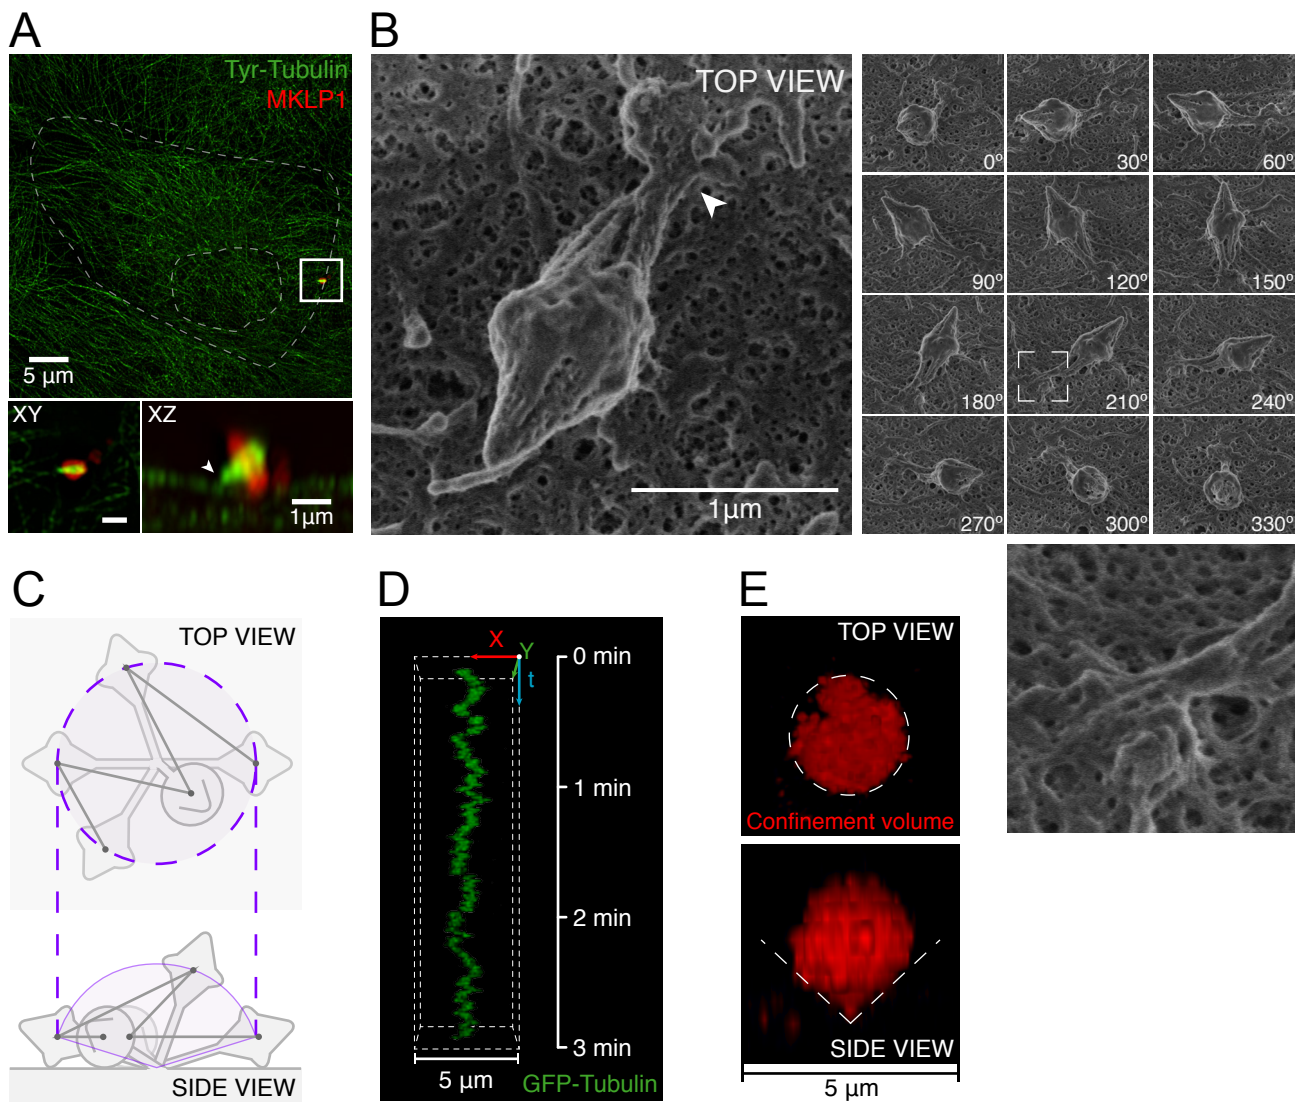

Figure 1. **The MBR is on the surface of MDCK cells.** (A) An MBR as seen by super-resolution confocal microscopy in cells stained for tyrosinated  $\alpha$ -tubulin and the FB marker MKLP1 (top panel). Dashed lines indicate cell and nuclear contours. The enlargement of the boxed region shows the characteristic ring-like structure of the FB flanked by microtubules, as seen in both XY and XZ views (bottom panels). The arrowhead indicates the absence of microtubule bundles in the cytoplasmic region adjacent to the MBR. (B) Images of a connected MBR on the plasma membrane as observed by SEM in top (left panels) and side views (middle right panels). Numbers indicate the angle of rotation of the sample stage. The arrowhead shows the connection point. The boxed region was enlarged to show the existence of continuity between the MBR membrane and the plasma membrane (bottom panel). The conical structures at the sides of the FB are of similar length and, therefore, this MBR is shown as representative of symmetrical connected MBRs. (C-E) Graphical representation in top and side views of the confinement volume in which MBR movement is restricted (C). (D) Kymograph showing a 3D reconstruction of the movement of an MBR, as visualized with GFP-tubulin, over time in a live cell. (E) Top and side views of the funnel-shaped confinement volume calculated from the same MBR. See also Fig. S1 and Video 1.

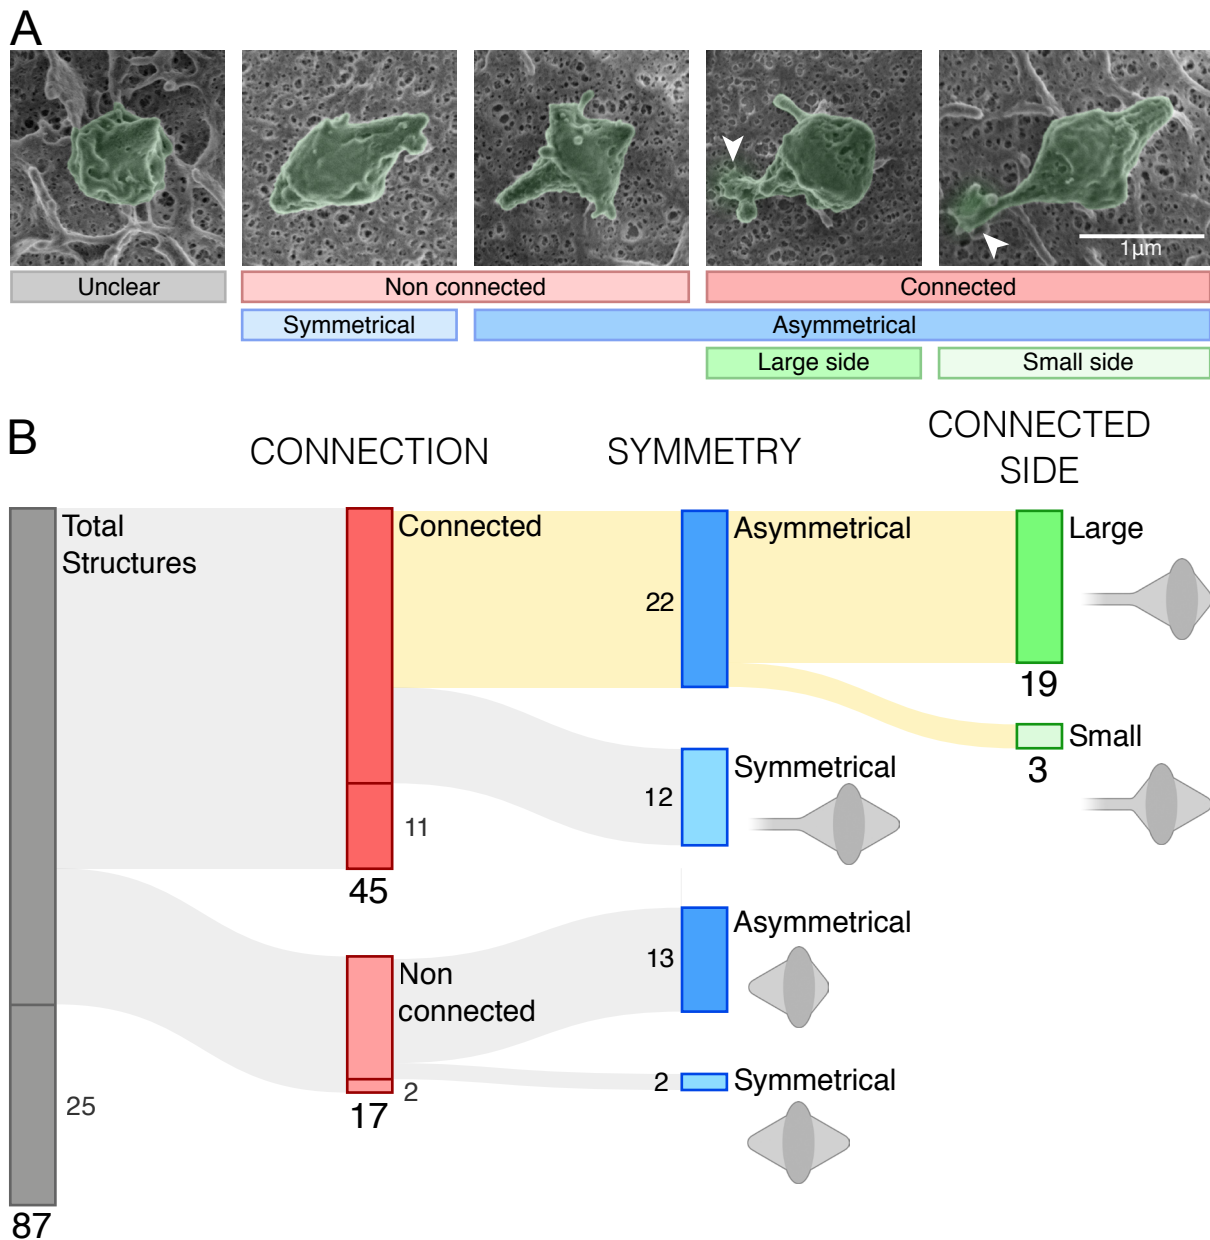

Figure 2. **Most MBRs remain physically connected to the plasma membrane.** (A) Representative examples of MBR morphologies others than those shown in Fig. 1. Arrowheads indicate connection points. (B) Sankey diagram showing the results of our MBR morphology analysis. Large and small sized numbers indicate the population size of each class and of the subclasses, respectively. See also Fig. S2.

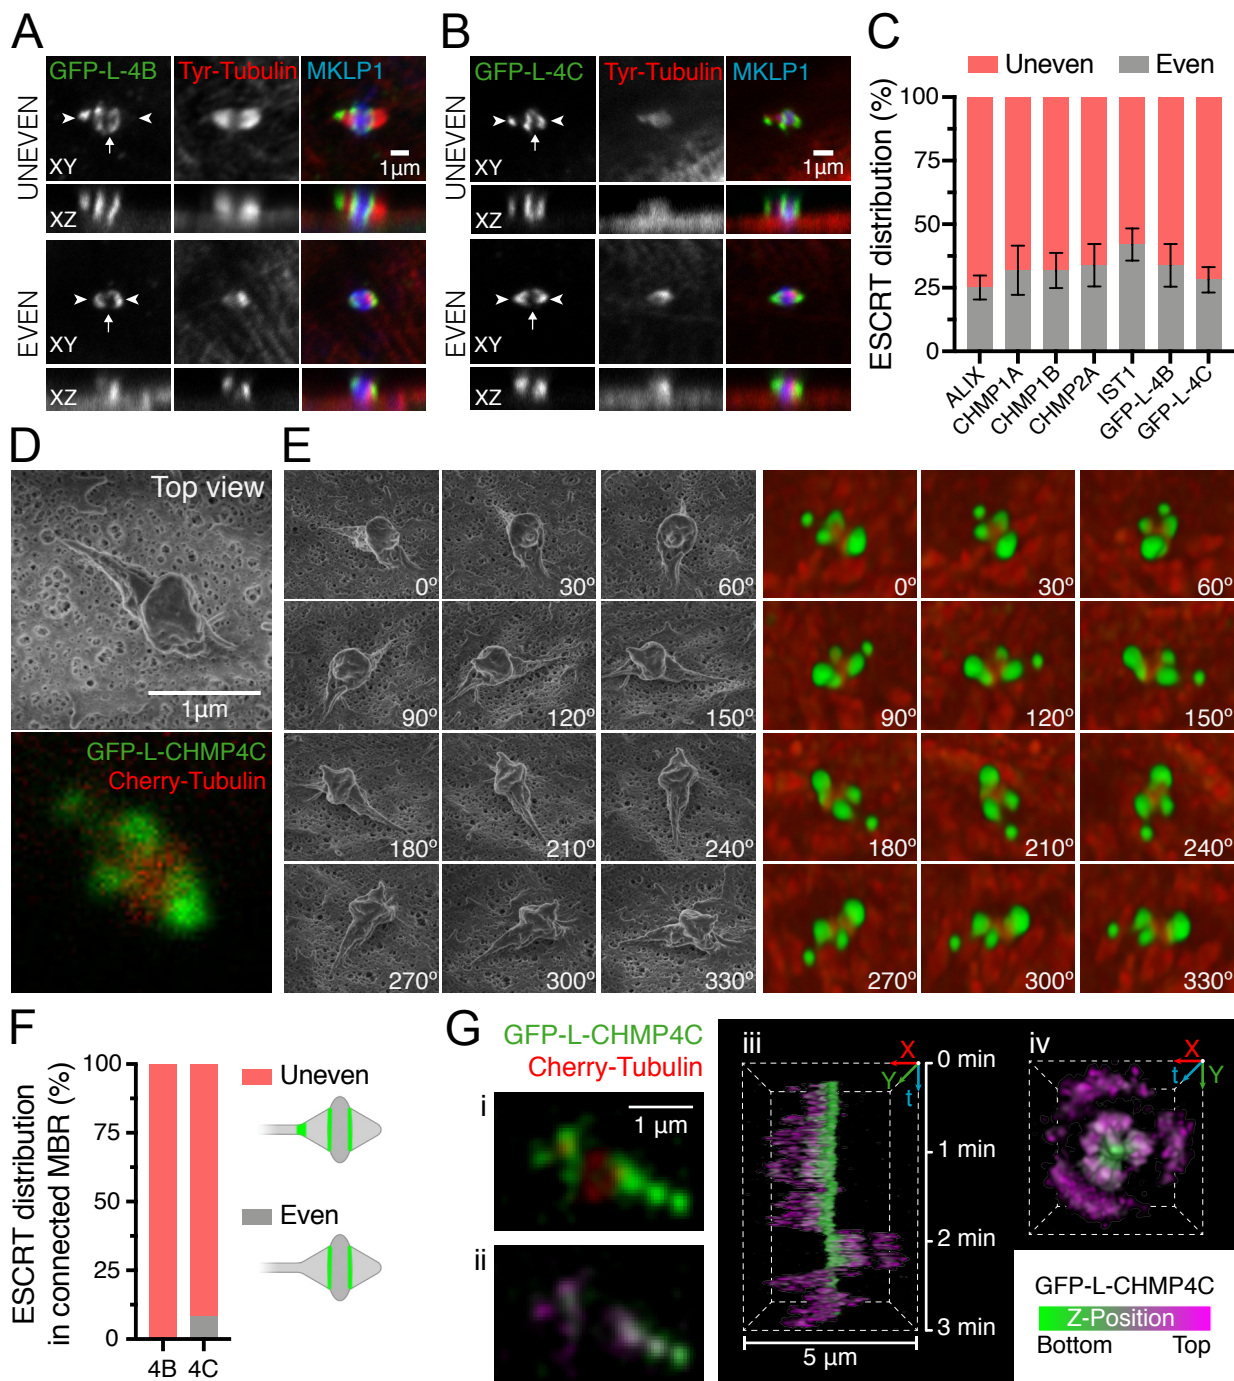

**Figure 3. The ESCRT machinery locates to the membranous connection between the MBR and the plasma membrane.** (A-C) Distribution of GFP-L-CHMP4B (GFP-L-4B) (A) and GFP-L-CHMP4C (GFP-L-4C) (B) at the MBR. XY and XZ views of MBRs with uneven (top panels) and even (bottom panels) distribution of these markers. The arrow and the arrowheads in A and B indicate the FB and the MBR tips, respectively. (C) Histogram showing the percentage of MBRs with uneven and even distribution for GFP-L-CHMP4B, GFP-L-CHMP4C and a panel of endogenous ESCRT markers. Data are summarized as the mean  $\pm$  SD from three independent experiments ( $n=29-93$ ). (D, E) CLEM images showing the presence of GFP-L-CHMP4C at the connection of the MBR with the plasma membrane. (D) Top-view image of a connected MBR acquired by SEM (top) and confocal microscopy (bottom). (E) Side view SEM images (left panels) and matching confocal images obtained by 3D reconstruction (right). Numbers indicate the angle of sample-stage rotation. (F) Quantification of GFP-L-CHMP4B and GFP-L-CHMP4C distribution in connected MBRs as observed by CLEM ( $n=16$  and 18, respectively). (G) Tracks of GFP-L-CHMP4C and Cherry-tubulin movement of an MBR in a live cell. (i) GFP-L-CHMP4C and Cherry-tubulin distribution in an MBR; (ii) image of the distribution GFP-L-CHMP4C using the indicated depth-color scale; (iii and iv) 3D reconstructions of the movement followed by the MBR over a 3-min period. See also Fig. S3 and Video 2.



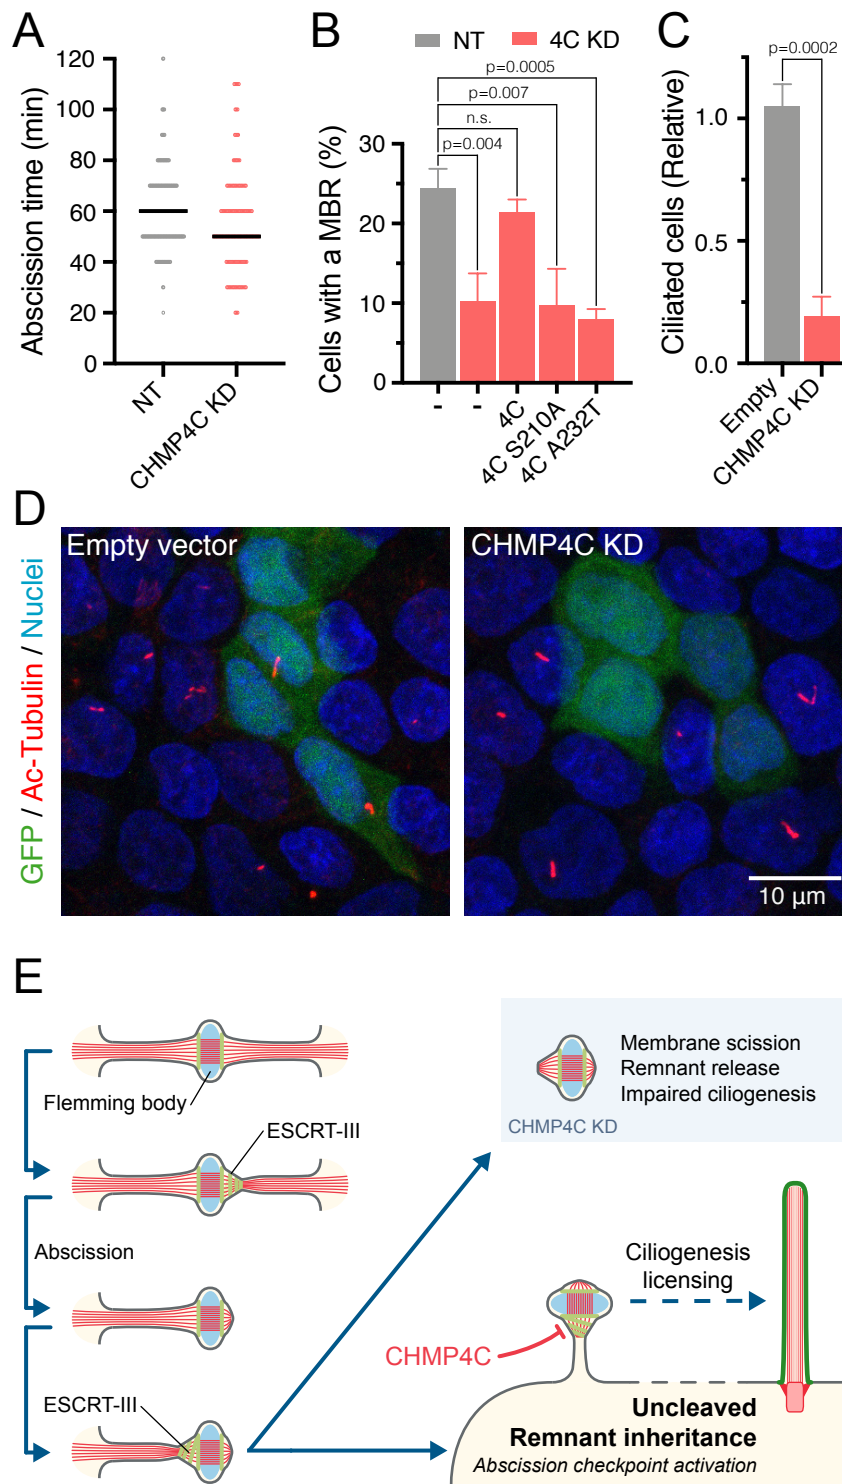

Figure 4. **CHMP4C is required for MBR inheritance and primary ciliogenesis.** (A) The time between the formation of the midbody and abscission was measured in control (gray points) and siRNA-mediated CHMP4C-knockdown (KD) cells (red points). Three independent experiments (n=27-159 in control cells; n=8-95 in CHMP4C KD cells) were performed. Black bars represent median values. (B) Percentage of cells with an MBR in control (gray bar) and siRNA-mediated CHMP4C-KD cells (red bars) expressing the indicated exogenous CHMP4 proteins (n=2714-3447 cells for control and n=800-1463 for KD cells). (C) Effect of CHMP4C knockdown on the frequency of ciliated cells. The number of cells with a primary cilium in cells expressing GFP alone or both GFP and shCHMP4C was expressed relative to that of non-transfected cells (n=77-88 for control; n=70-161 for CHMP4C KD cells). (D) Representative fields of cells expressing GFP alone, or both GFP and shCHMP4C stained for acetylated tubulin to visualize the primary cilium. The mean  $\pm$  SD from three independent experiments are shown in (B, C). Probabilities are those associated with unpaired two-tailed Student's t-tests. (E) Schematic model. CHMP4C delays the cleavage of the intact MB arm after abscission and doing so determines the fate of the MBR. An MBR that is physically connected to the plasma membrane is the MBR form used by the cell to prepare the centrosome for primary cilium formation. See also Fig. S4.

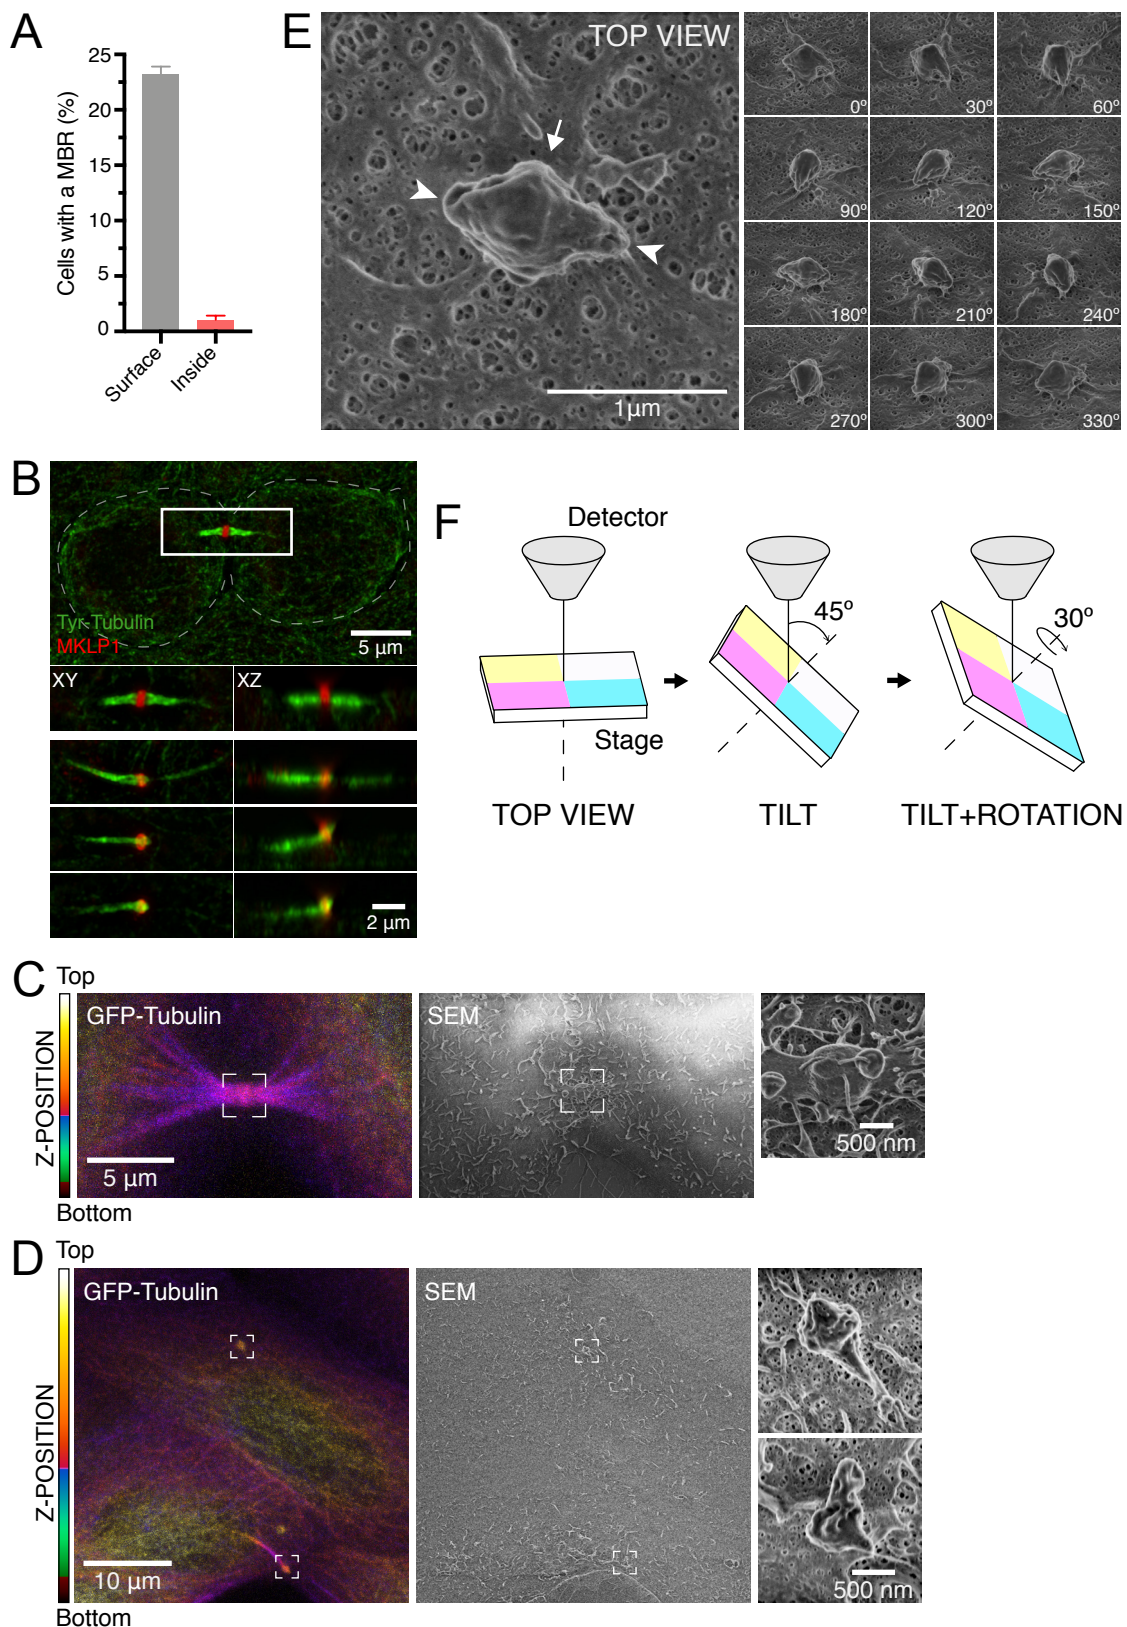

**Figure S1. Localization of MBRs in MDCK cells.** (A) The surface or intracellular localization of MBRs was analyzed by confocal microscopy. Data are summarized as the mean  $\pm$  SD of the percentage of cells with an MBR from three independent experiments ( $n=285-296$  cells). (B) Cytokinetic stages observed by super-resolution confocal microscopy. Panoramic view of two sister cells connected by an MB (top panel) and enlargement of the MB region before and immediately after abscission (bottom panels). The dashed line delineates the cell contour. Note the microtubule bundles flanking the FB. (C, D) Examples of CLEM imaging. Images of an MB before (C) and after abscission (D). Confocal depth-coded color images of GFP-tubulin distribution (left), the corresponding SEM images (center), and enlargement of the boxed region that contains the structure of interest. The color scale used is indicated. (E) Image of a non-connected MBR on the plasma membrane as observed by SEM in top (left panels) and side views (right). Numbers indicate the angle of rotation of the sample stage. The arrow and the arrowheads indicate the FB and the MBR tips, respectively. (F) Procedure of side view image acquisition by SEM using tilting and rotation of the sample stage.

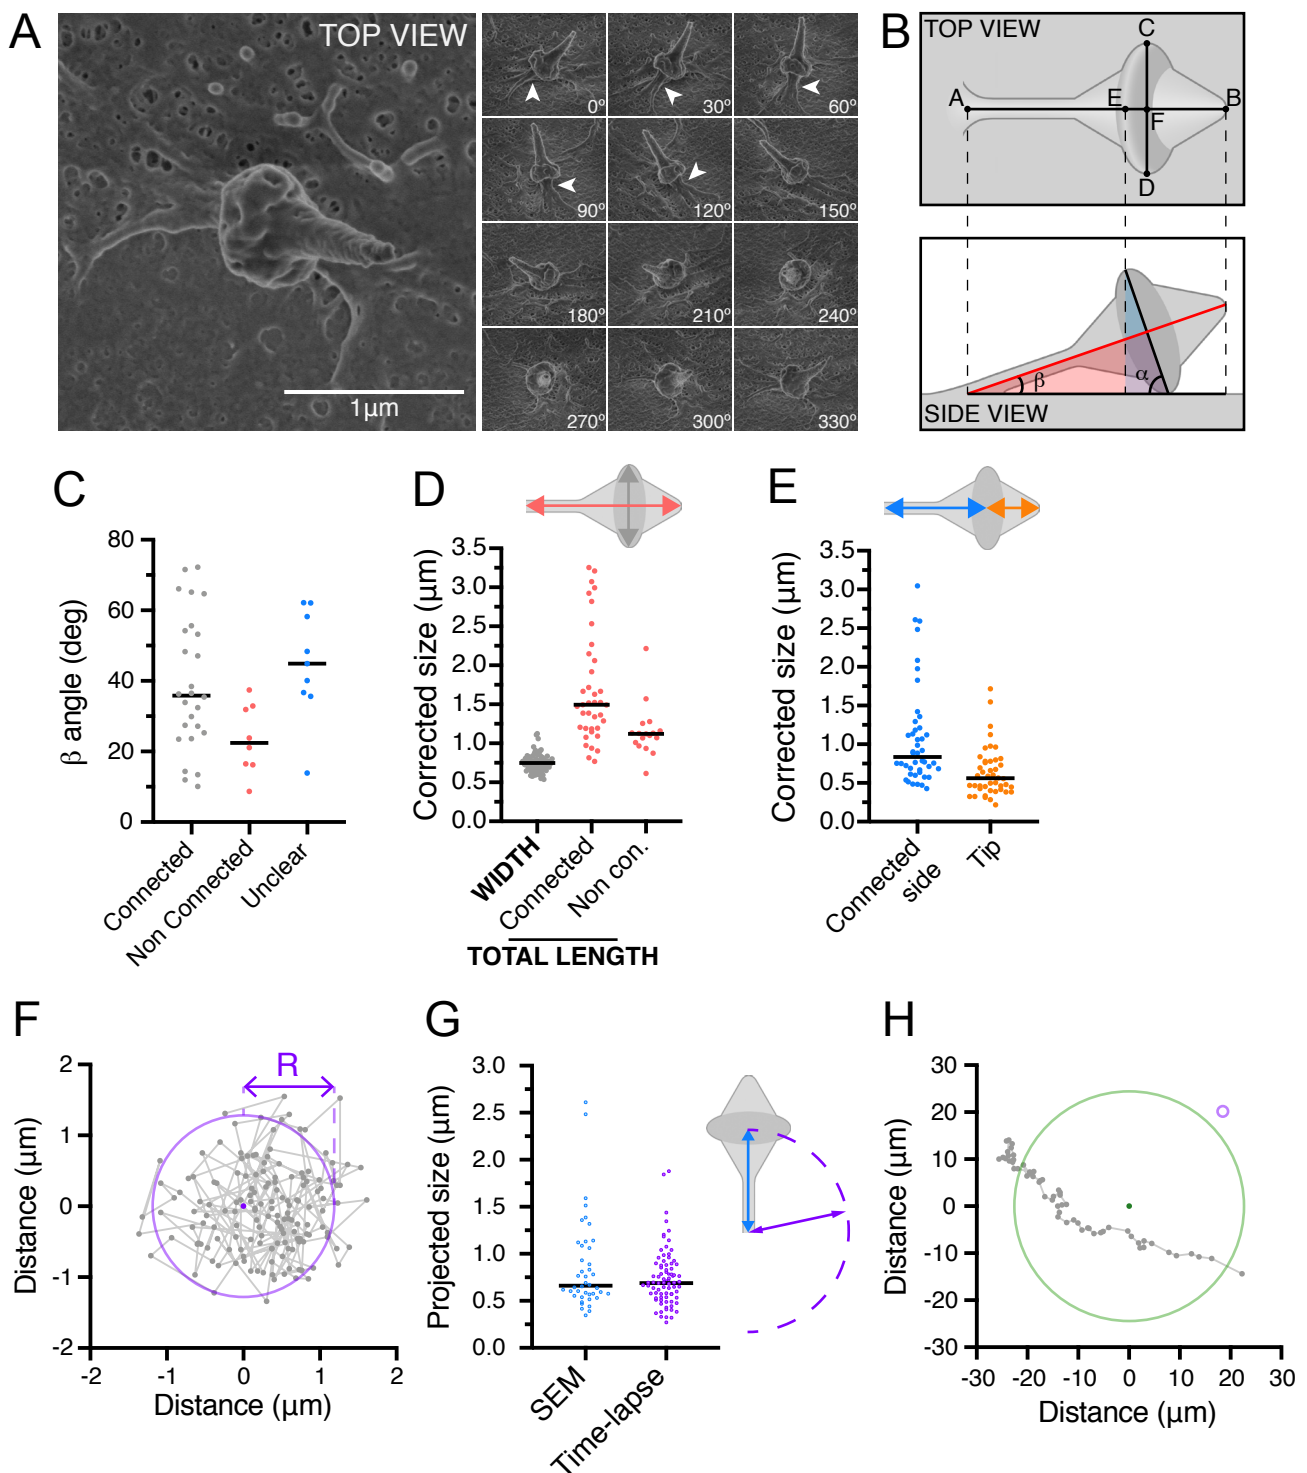

Figure S2. **Quantification of MBR size.** (A) Top-view image of an example of an MBR classified as an unclear case (left). The tilt series reveals that the MBR is connected to the plasma membrane (arrowheads; right panels). (B) Schematic illustrating how MBRs appear in top- and side-view images. MBR width was defined as the major axis of the FB (C-D line). The projected length of the long axis of the MBR is the distance between the two ends of the structure (A-B line). The intersection of the two lines defines the center of the FB (point F), which allows the measurement of the projected distance (A-F line) between the connection point and the center of the FB. The inclination angle ( $\beta$ ) of the MBR with respect to the cell surface was derived from the inclination angle of the FB large axis ( $\alpha$ ), which was calculated from the distance between the FB rim (point E) and its center (point F). (C)  $\beta$  angle values for MBRs classified as connected, non-connected and unclear. Black bars represent median values. (D) Quantification of FB width ( $n=87$ ) and total MBR length of connected ( $n=38$ ) and non-connected ( $n=17$ ) structures. (E) Length of the two sides flanking the FB in connected MBRs ( $n=38$ ). Black bars indicate median values. (F) Example of the trajectory followed by an MBR. The purple dot represents the center of the trajectory. The circumference includes 95% of the dots. (G) Measurements of the projected distance between the connection point and the FB by SEM ( $n=42$ ) compared with that calculated by the analysis of MBR trajectories obtained from time-lapse experiments ( $n=81$ ). (H) Trajectory followed by a released MBR. The purple circle was drawn to be the same size as that in (F). Black bars represent median values.

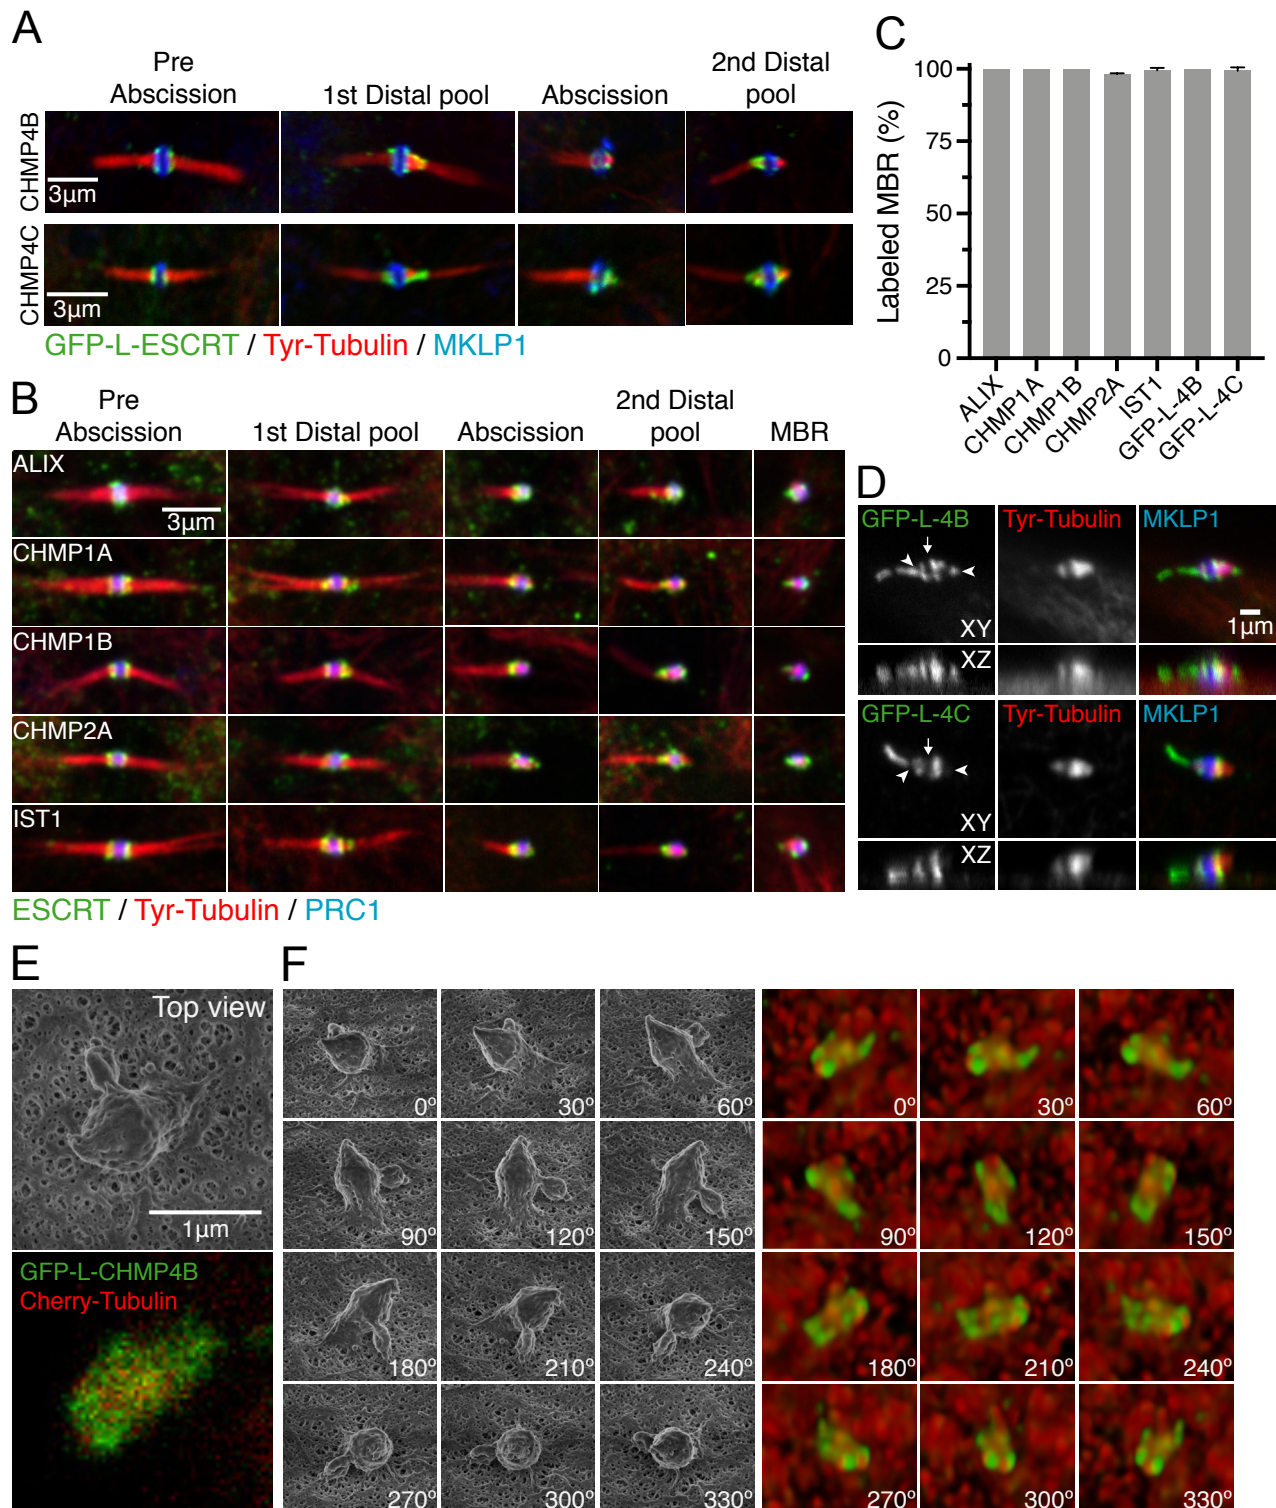

**Figure S3. Distribution of ESCRT proteins at the MB and at the connection of the MBR with the plasma membrane.** (A-C) Localization of GFP-L-CHMP4B and GFP-L-CHMP4C (A) and a panel of endogenous ESCRT proteins (B) at different stages of cytokinesis. (C) Percentage of MBRs positive for the indicated ESCRT proteins. The histogram represents the mean  $\pm$  SD from three independent experiments ( $n=35-139$ ). (D) Examples of MBRs showing uneven ESCRT distribution with an elongated pool of GFP-L-CHMP4B (top) and GFP-L-CHMP4C (bottom) in XY and XZ views. The arrow and the arrowheads indicate the FB and the MBR tips, respectively. (E, F) CLEM images showing the localization of GFP-L-CHMP4B at the connection between the MBR and the plasma membrane. (E) Top-view images of the same connected MBR acquired by SEM (top) and confocal microscopy (bottom). (F) Tilt series of SEM images (left) and the corresponding 3D reconstruction of the confocal images (right). Numbers indicate the rotation angle of the sample stage.

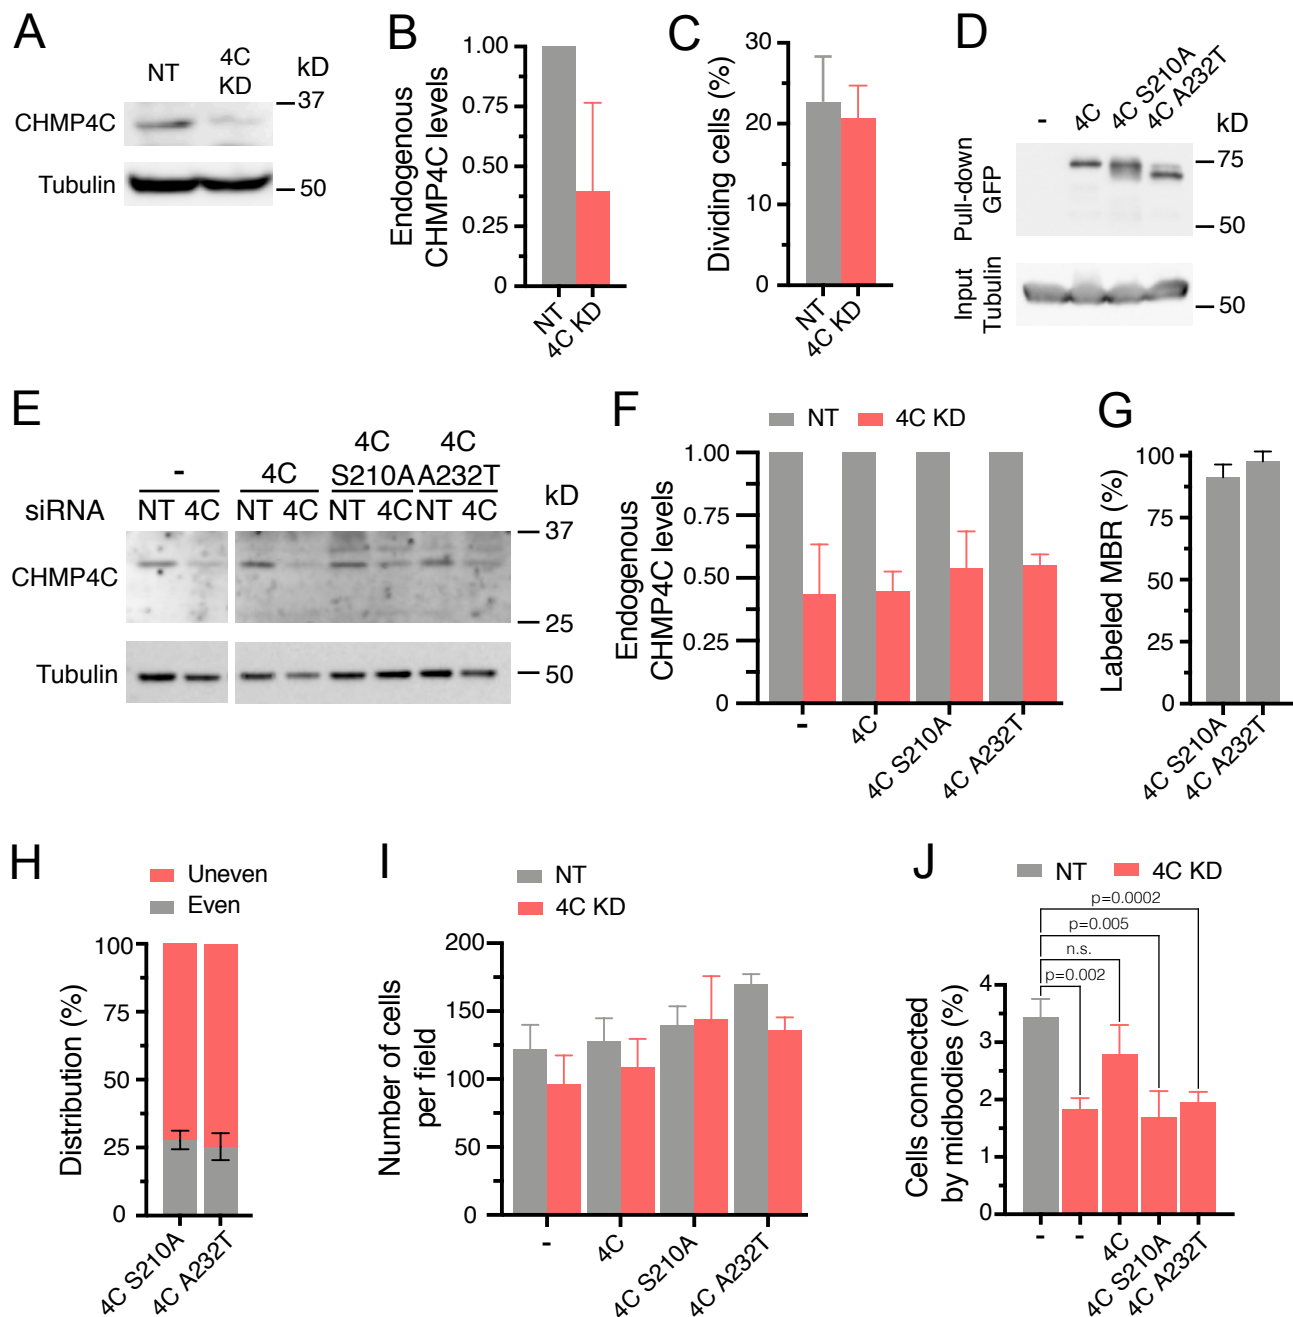

**Figure S4. Effect of CHMP4C knockdown on the percentages of dividing cells and cells connected by an MB. (A, B)** Representative immunoblot showing the effect of siCHMP4C on endogenous CHMP4C levels for the experiments shown in Fig. 4A and S4C (A). (B) Quantification of CHMP4C KD by siCHMP4C. The histogram represents the levels of CHMP4C in siCHMP4C-transfected cells relative to cells transfected with control siNT. **(C)** Effect of CHMP4C KD on the frequency of dividing cells as determined by time-lapse experiments. The histogram represents the percentage of dividing cells relative to the initial number of cells. Three independent experiments (n=27-159 in control cells; n=8-95 in CHMP4C KD cells) were performed. **(D)** Immunoblot of a GFP-trap experiment showing the relative expression levels of the indicated GFP-fused CHMP4C proteins. **(E, F)** Representative immunoblot (E) and quantification of endogenous CHMP4C levels (F) of siCHMP4C-transfected cells expressing the indicated CHMP4C exogenous proteins for the experiments shown in Fig. 4B and S4I, J. **(G, H)** Percentage of MBRs positive for the indicated CHMP4C mutants (n=58-80) (G). (H) Even or uneven distribution of the CHMP4C mutants in the MBR (n=37-56). **(I, J)** Total number of cells per field (I) and percentage of cells connected by an MB (J) in control cells and CHMP4C KD cells expressing the indicated exogenous CHMP4C proteins. The histograms in (B, C, F-J) show the mean  $\pm$  SD from three independent experiments.

Video 1. **MBR movement on the apical surface.** 3D analysis of the movement of an MBR in a live cell expressing GFP-tubulin.

Video 2. **GFP-L-CHMP4C and Cherry-tubulin distribution in a moving MBR.** (Left) GFP-L-CHMP4C and Cherry-tubulin fluorescence. (Right) The GFP-L-CHMP4C signal was pseudocolored using the indicated depth-color scale.
